# Supplementary material for: Long Covid after Breakthrough COVID-19: the post-acute sequelae of breakthrough COVID-19
Source: Research Square preprint supplement (doi:10.21203/rs.3.rs-1062160/v1), 2021-11-15
Supplement: Supplementary file 1 [file aa304a740360379bd46dadeb.pdf]

Extended data figure 1

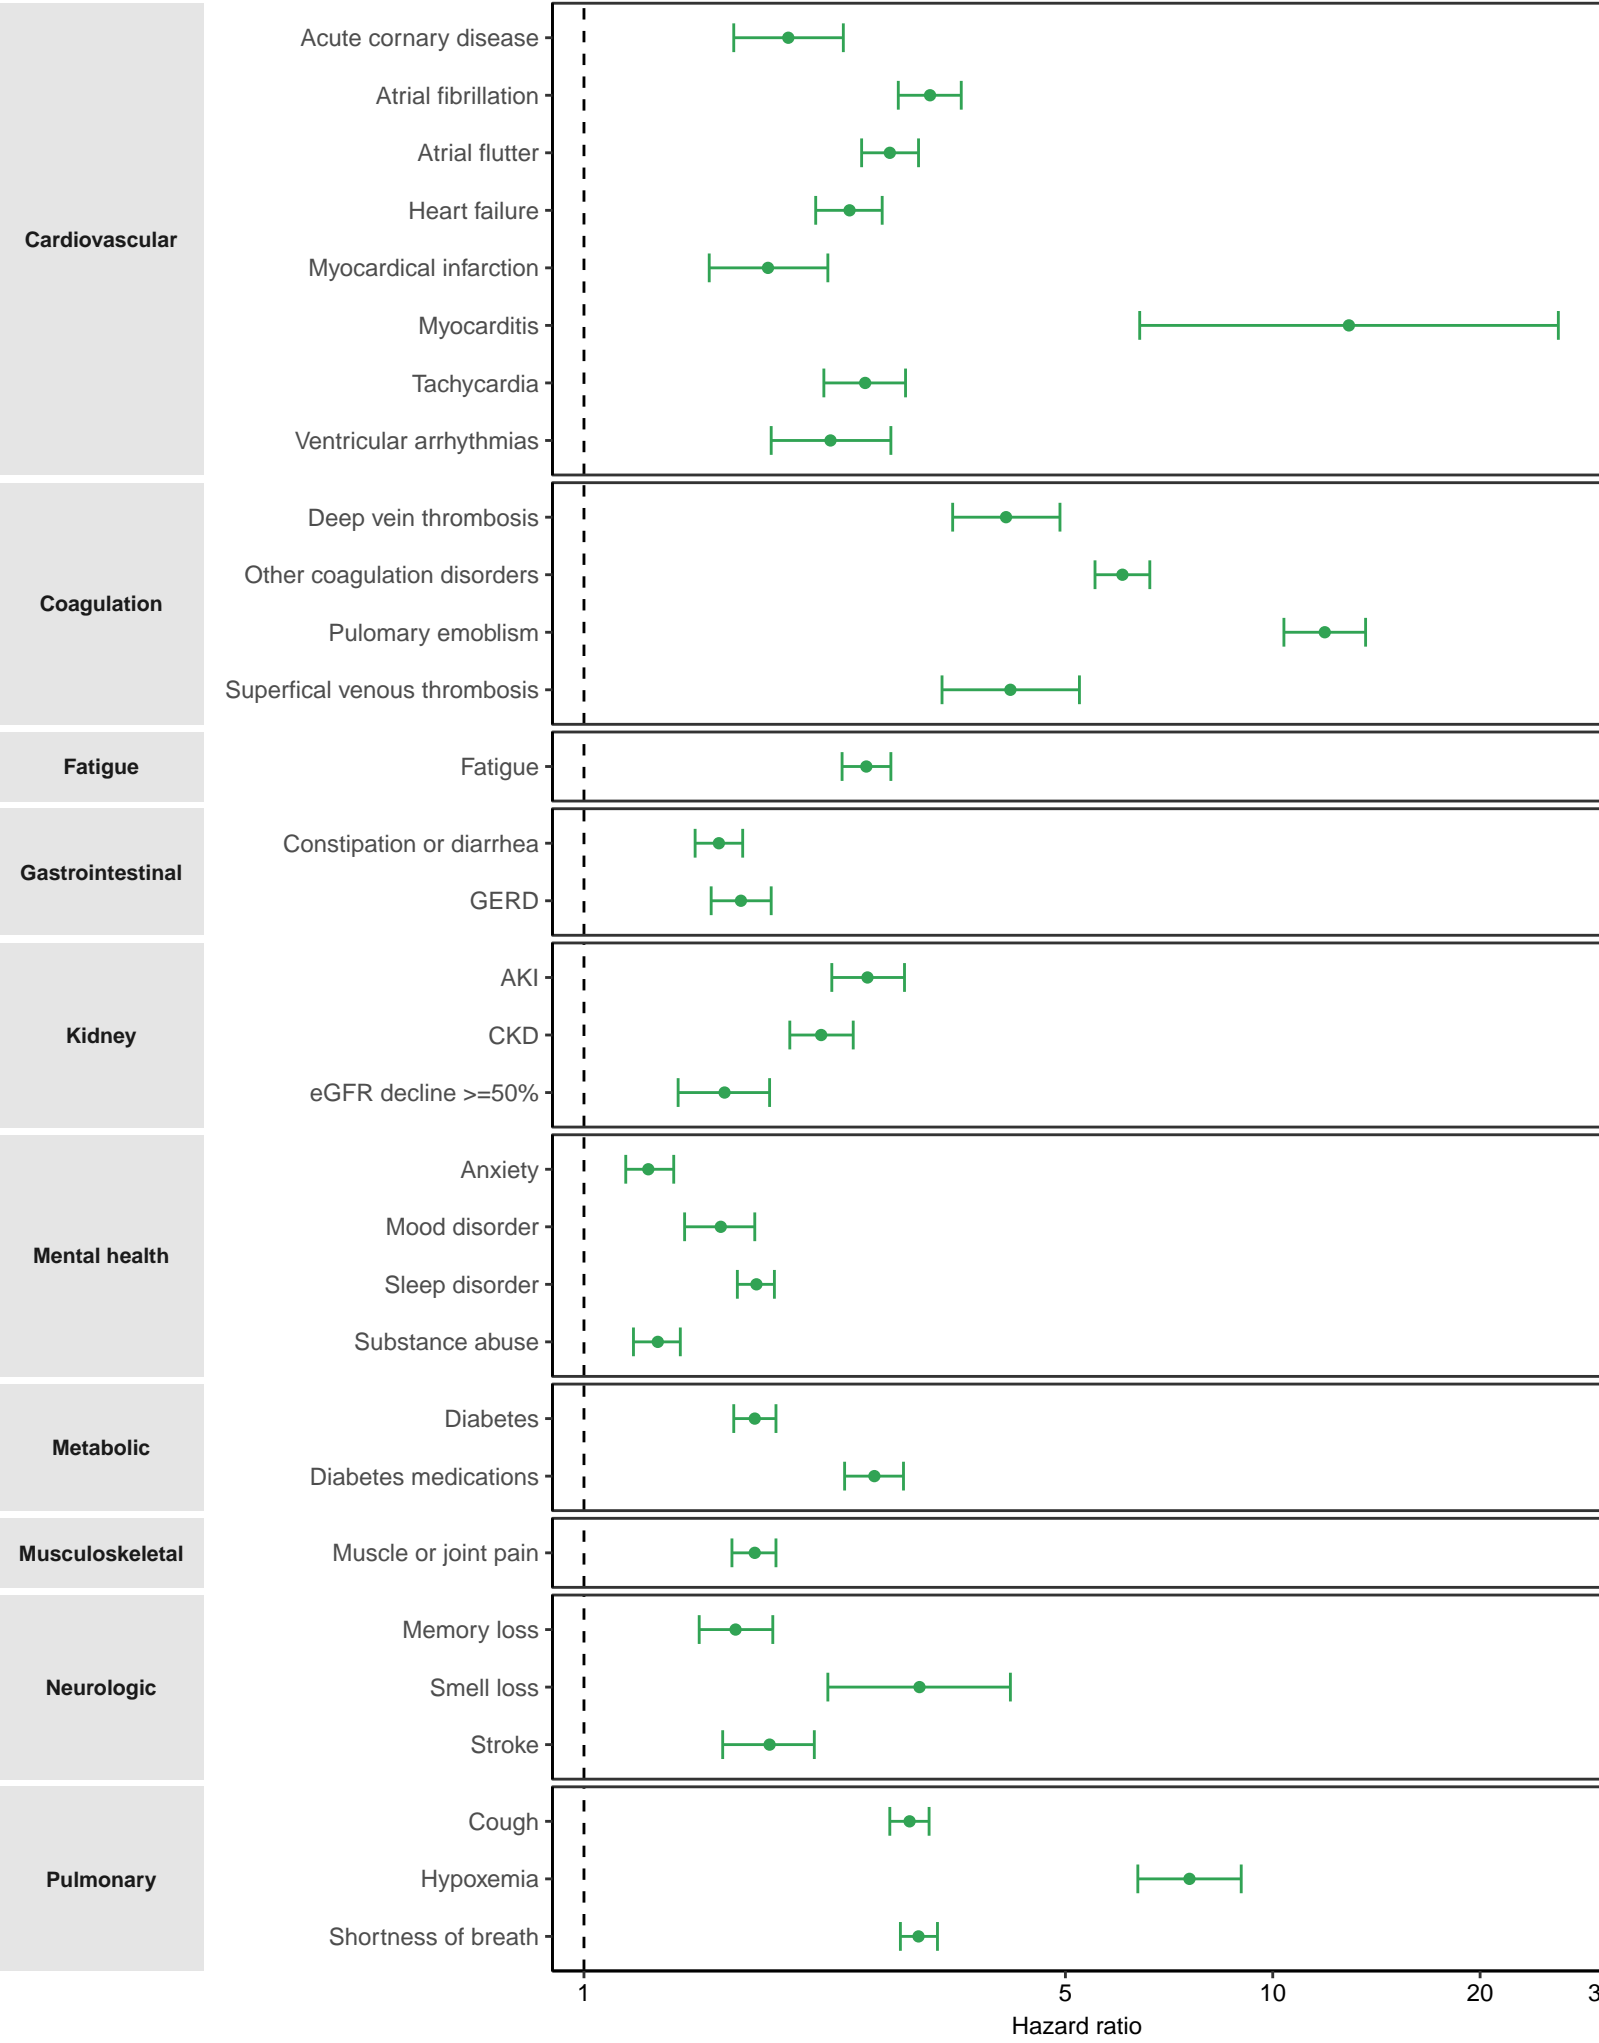

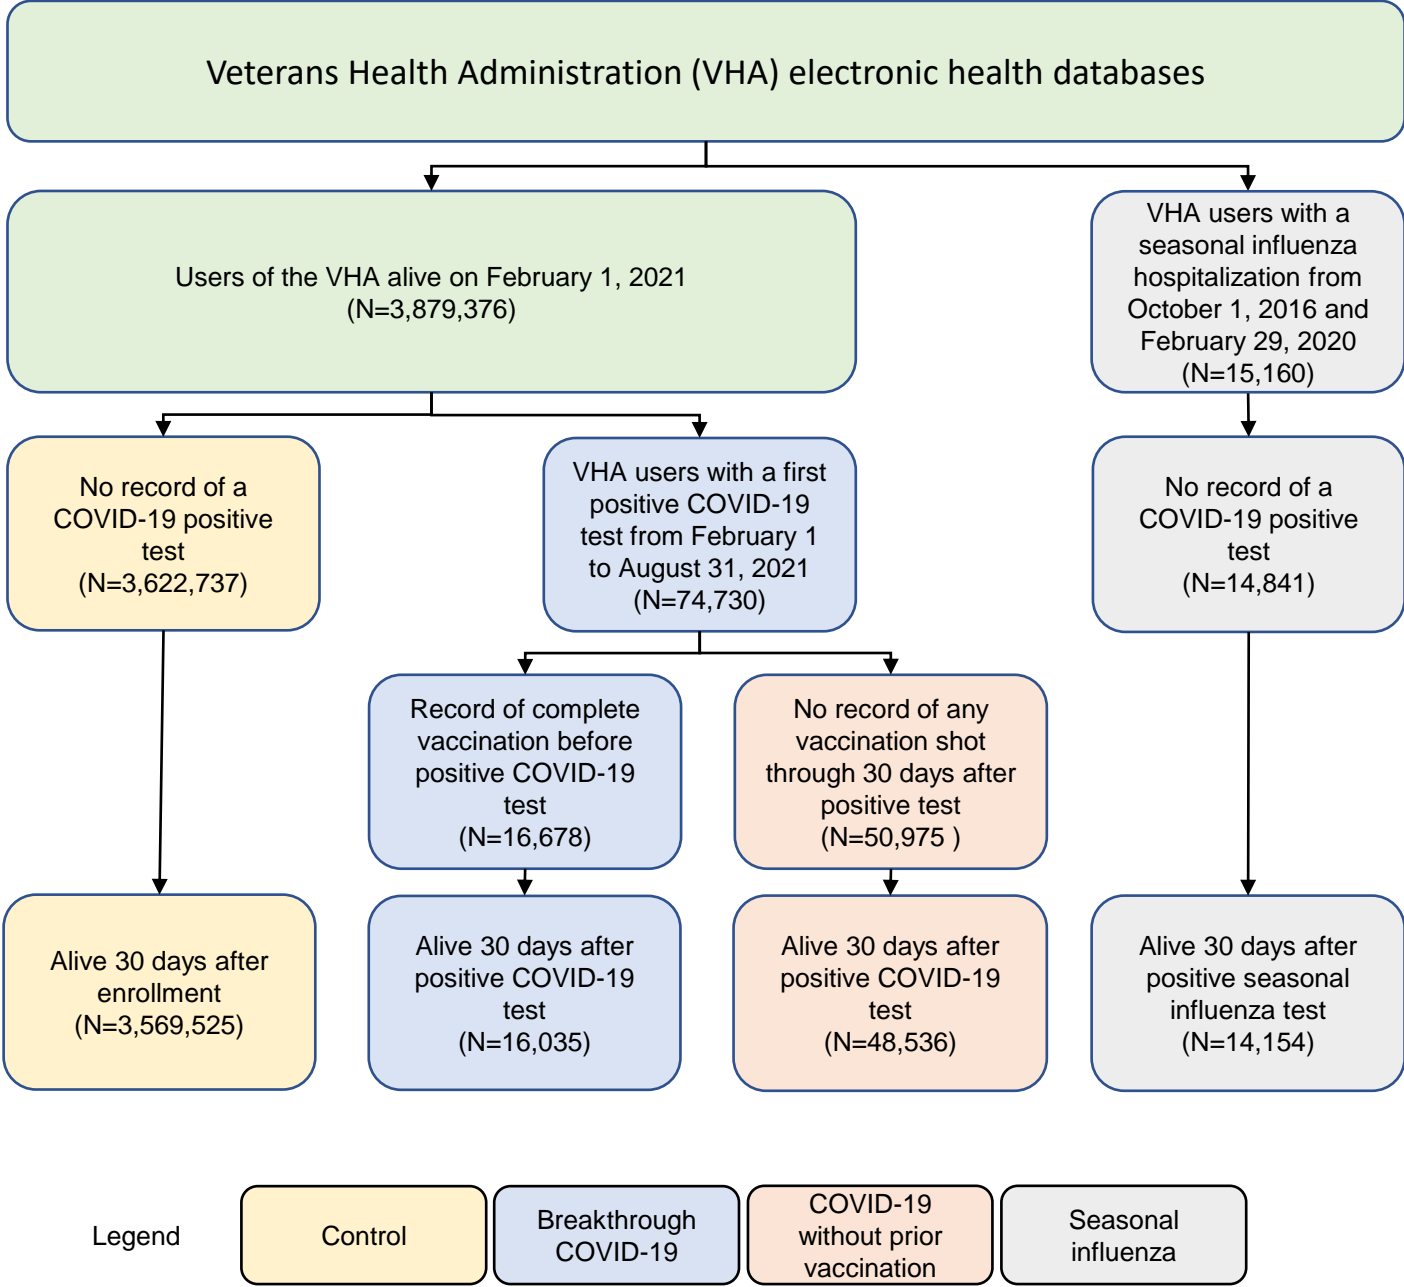

Extended Data Figure 2

**Extended Data Table 1:** Demographic and health characteristics of those with breakthrough COVID-19 and the control group.

| Characteristic                                                                                                                                         | Breakthrough COVID-19 (N=16,035) | Control (N=3,569,525) |
|--------------------------------------------------------------------------------------------------------------------------------------------------------|----------------------------------|-----------------------|
| Age, mean SD                                                                                                                                           | 66.62 (13.79)                    | 63.82 (16.09)         |
| Race, N (%)                                                                                                                                            |                                  |                       |
| White                                                                                                                                                  | 11,436 (71.32)                   | 2,736,491 (76.66)     |
| Black                                                                                                                                                  | 3,395 (21.17)                    | 665,774 (18.65)       |
| Other                                                                                                                                                  | 1,204 (7.51)                     | 167,260 (4.69)        |
| Sex, N (%)                                                                                                                                             |                                  |                       |
| Male                                                                                                                                                   | 14,643 (91.32)                   | 3,230,996 (90.52)     |
| Female                                                                                                                                                 | 1,391 (8.68)                     | 338,529 (9.48)        |
| ADI <sup>a</sup> , mean SD                                                                                                                             | 52.41 (15.06)                    | 51.78 (15.90)         |
| Smoking status, N (%)                                                                                                                                  |                                  |                       |
| Never                                                                                                                                                  | 8,264 (51.54)                    | 1,792,956 (50.23)     |
| Former                                                                                                                                                 | 4,674 (29.15)                    | 936,518 (26.24)       |
| Current                                                                                                                                                | 3,097 (19.31)                    | 840,051 (23.53)       |
| Long-term care, N (%)                                                                                                                                  | 246 (1.53)                       | 21,814 (0.61)         |
| Systolic blood pressure, mean SD                                                                                                                       | 132.79 (19.07)                   | 131.55 (16.78)        |
| BMI, (mean SD)                                                                                                                                         | 30.80 (6.40)                     | 30.90 (232.06)        |
| Cerebrovascular disease, N (%)                                                                                                                         | 1,380 (8.61)                     | 161,188 (4.52)        |
| Cancer, N (%)                                                                                                                                          | 2,073 (12.93)                    | 228,989 (6.42)        |
| Anxiety, N (%)                                                                                                                                         | 2,121 (13.23)                    | 306,387 (8.58)        |
| Chronic kidney disease, N (%)                                                                                                                          | 2,309 (14.40)                    | 492,848 (13.81)       |
| Cardiovascular disease, N (%)                                                                                                                          | 3,869 (24.13)                    | 470,963 (13.19)       |
| Dementia, N (%)                                                                                                                                        | 1,056 (6.59)                     | 113,220 (3.17)        |
| Depression, N (%)                                                                                                                                      | 1,753 (10.93)                    | 250,405 (7.02)        |
| Diabetes mellitus type 2, N (%)                                                                                                                        | 6,150 (38.35)                    | 845,115 (23.68)       |
| Lung disease, N (%)                                                                                                                                    | 3,088 (19.26)                    | 404,159 (11.32)       |
| Peripheral artery disease, N (%)                                                                                                                       | 348 (2.17)                       | 32,931 (0.92)         |
| Receipt of seasonal influenza vaccine in the year prior, N (%)                                                                                         | 6,118 (38.15)                    | 951,955 (26.67)       |
| Number of inpatient visits, median (IQR)                                                                                                               | 0 (0, 0)                         | 0 (0, 0)              |
| Number of outpatient visits, median (IQR)                                                                                                              | 3 (2, 4)                         | 2 (1, 3)              |
| Number of blood chemistry panels, median (IQR)                                                                                                         | 2 (1, 4)                         | 1 (0, 2)              |
| Number of unique medications, median (IQR)                                                                                                             | 11 (6, 18)                       | 5 (1, 11)             |
| Vaccination type, N (%)                                                                                                                                |                                  |                       |
| Ad26.COV2.S                                                                                                                                            | 1807 (11.3%)                     | -                     |
| mRNA-1273                                                                                                                                              | 6086 (38.0%)                     | -                     |
| BNT162b2                                                                                                                                               | 8142 (50.8%)                     | -                     |
| Incident breakthrough rates <sup>b</sup> , per 1000 persons at 6-months (95% CI)                                                                       |                                  |                       |
| Overall                                                                                                                                                | 7.26 (7.25, 7.26)                | -                     |
| Ad26.COV2.S                                                                                                                                            | 14.72 (14.70, 14.75)             | -                     |
| mRNA-1273                                                                                                                                              | 5.57 (5.56, 5.57)                | -                     |
| BNT162b2                                                                                                                                               | 8.31 (8.31, 8.31)                | -                     |
| Calendar week of vaccination completion in 2021, median (IQR)                                                                                          | 12 (9, 16)                       | -                     |
| Calendar week of breakthrough infection in 2021, median (IQR)                                                                                          | 31 (27, 33)                      | -                     |
| Time (in weeks) between completion of vaccination to positive COVID-19 test, median (IQR)                                                              | 17 (10, 21)                      | -                     |
| All characteristics assessed in the year prior to testing positive for COVID-19, or equivalent T <sub>0</sub> .                                        |                                  |                       |
| <sup>a</sup> ADI is a composite measure of socioeconomic deprivation that ranges from 0 (low deprivation) to 100 (high deprivation).                   |                                  |                       |
| <sup>b</sup> Among those with record of complete vaccination in the VHA (N=3,165,714 overall; 205222 Ad26.COV2.S; 1358794 mRNA-1273; 1601597 BNT162b2) |                                  |                       |
| ADI, Area Deprivation Index; BMI, body mass index; IQR, interquartile range; N, sample size; SD, standard deviation.                                   |                                  |                       |

**Extended Data Table 2:** Demographic and health characteristics of those with breakthrough COVID-19 who were not hospitalized, those who were hospitalized during the acute phase of the disease, and the control group.

| Characteristic                                                                                                                       | Not hospitalized <sup>a</sup><br>breakthrough<br>COVID-19<br>(N=13,683) | Hospitalized <sup>a</sup><br>breakthrough COVID-<br>19<br>(N=2,352) | Control<br>(N=3,569,525) |
|--------------------------------------------------------------------------------------------------------------------------------------|-------------------------------------------------------------------------|---------------------------------------------------------------------|--------------------------|
| Age, (mean SD)                                                                                                                       | 65.68 (13.97)                                                           | 72.14 (11.18)                                                       | 63.82 (16.09)            |
| Race, N (%)                                                                                                                          |                                                                         |                                                                     |                          |
| White                                                                                                                                | 9,831 (71.85)                                                           | 1,605 (68.24)                                                       | 2,736,491 (76.66)        |
| Black                                                                                                                                | 2,823 (20.63)                                                           | 572 (24.32)                                                         | 665,774 (18.65)          |
| Other                                                                                                                                | 1,029 (7.52)                                                            | 175 (7.44)                                                          | 167,260 (4.69)           |
| Sex, N (%)                                                                                                                           |                                                                         |                                                                     |                          |
| Male                                                                                                                                 | 12,389 (90.55)                                                          | 2,254 (95.83)                                                       | 3,230,996 (90.52)        |
| Female                                                                                                                               | 1,293 (9.45)                                                            | 98 (4.17)                                                           | 338,529 (9.48)           |
| ADI <sup>b</sup> , (mean SD)                                                                                                         | 52.30 (15.13)                                                           | 53.03 (14.67)                                                       | 51.78 (15.90)            |
| Smoking status, N (%)                                                                                                                |                                                                         |                                                                     |                          |
| Never                                                                                                                                | 7,178 (52.46)                                                           | 1,086 (46.17)                                                       | 1,792,956 (50.23)        |
| Former                                                                                                                               | 3,916 (28.62)                                                           | 758 (32.23)                                                         | 936,518 (26.24)          |
| Current                                                                                                                              | 2,589 (18.92)                                                           | 508 (21.60)                                                         | 840,051 (23.53)          |
| Long-term care, N (%)                                                                                                                | 157 (1.15)                                                              | 89 (3.78)                                                           | 21,814 (0.61)            |
| Systolic blood pressure, mean SD                                                                                                     | 132.47 (18.16)                                                          | 134.65 (23.60)                                                      | 131.55 (16.78)           |
| BMI, (mean SD)                                                                                                                       | 30.94 (6.29)                                                            | 29.95 (6.91)                                                        | 30.90 (232.06)           |
| Cerebrovascular disease, N (%)                                                                                                       | 1,014 (7.41)                                                            | 366 (15.56)                                                         | 161,188 (4.52)           |
| Cancer, N (%)                                                                                                                        | 1,559 (11.39)                                                           | 514 (21.85)                                                         | 228,989 (6.42)           |
| Anxiety, N (%)                                                                                                                       | 1,690 (12.35)                                                           | 431 (18.32)                                                         | 306,387 (8.58)           |
| Chronic kidney disease, N (%)                                                                                                        | 1,674 (12.23)                                                           | 635 (27.00)                                                         | 492,848 (13.81)          |
| Cardiovascular disease, N (%)                                                                                                        | 2,963 (21.65)                                                           | 906 (38.52)                                                         | 470,963 (13.19)          |
| Dementia, N (%)                                                                                                                      | 737 (5.39)                                                              | 319 (13.56)                                                         | 113,220 (3.17)           |
| Depression, N (%)                                                                                                                    | 1,399 (10.22)                                                           | 354 (15.05)                                                         | 250,405 (7.02)           |
| Diabetes mellitus type 2, N (%)                                                                                                      | 4,950 (36.18)                                                           | 1,200 (51.02)                                                       | 845,115 (23.68)          |
| Lung disease, N (%)                                                                                                                  | 2,349 (17.17)                                                           | 739 (31.42)                                                         | 404,159 (11.32)          |
| Peripheral artery disease, N (%)                                                                                                     | 229 (1.67)                                                              | 119 (5.06)                                                          | 32,931 (0.92)            |
| Receipt of seasonal influenza vaccine in the year prior, N (%)                                                                       | 5,080 (37.13)                                                           | 1,038 (44.13)                                                       | 951,955 (26.67)          |
| Number of inpatient visits, median (IQR)                                                                                             | 0 (0, 0)                                                                | 0 (0, 1)                                                            | 0 (0, 0)                 |
| Number of outpatient visits, median (IQR)                                                                                            | 3 (2, 4)                                                                | 4 (3, 5)                                                            | 2 (1, 3)                 |
| Number of blood chemistry panels, median (IQR)                                                                                       | 2 (1, 3)                                                                | 4 (2, 9)                                                            | 1 (0, 2)                 |
| Number of unique medications, median (IQR)                                                                                           | 10 (6, 17)                                                              | 17 (10, 23)                                                         | 5 (1, 11)                |
| All characteristics assessed in the year prior to testing positive for COVID-19, or equivalent T <sub>0</sub> .                      |                                                                         |                                                                     |                          |
| <sup>a</sup> Hospitalization assessed during the acute phase of the disease.                                                         |                                                                         |                                                                     |                          |
| <sup>b</sup> ADI is a composite measure of socioeconomic deprivation that ranges from 0 (low deprivation) to 100 (high deprivation). |                                                                         |                                                                     |                          |
| ADI, Area Deprivation Index; BMI, body mass index; IQR, interquartile range; N, sample size; SD, standard deviation.                 |                                                                         |                                                                     |                          |

**Extended Data Table 3:** Demographic and health characteristics of those with breakthrough COVID-19 and those with COVID-19 without prior vaccination.

| Characteristic                                                                                                                                                                                                                                                                                                                                                                                                                                                                                                                                                                                                                              | Breakthrough COVID-19 (N=16,035) | COVID-19 (N=48,536) |
|---------------------------------------------------------------------------------------------------------------------------------------------------------------------------------------------------------------------------------------------------------------------------------------------------------------------------------------------------------------------------------------------------------------------------------------------------------------------------------------------------------------------------------------------------------------------------------------------------------------------------------------------|----------------------------------|---------------------|
| Age, mean SD                                                                                                                                                                                                                                                                                                                                                                                                                                                                                                                                                                                                                                | 66.62 (13.79)                    | 56.07 (15.72)       |
| Race, N (%)                                                                                                                                                                                                                                                                                                                                                                                                                                                                                                                                                                                                                                 |                                  |                     |
| White                                                                                                                                                                                                                                                                                                                                                                                                                                                                                                                                                                                                                                       | 11,436 (71.32)                   | 34,537 (71.16)      |
| Black                                                                                                                                                                                                                                                                                                                                                                                                                                                                                                                                                                                                                                       | 3,395 (21.17)                    | 10,888 (22.43)      |
| Other                                                                                                                                                                                                                                                                                                                                                                                                                                                                                                                                                                                                                                       | 1,204 (7.51)                     | 3,111 (6.41)        |
| Sex, N (%)                                                                                                                                                                                                                                                                                                                                                                                                                                                                                                                                                                                                                                  |                                  |                     |
| Male                                                                                                                                                                                                                                                                                                                                                                                                                                                                                                                                                                                                                                        | 14,643 (91.32)                   | 41,670 (85.85)      |
| Female                                                                                                                                                                                                                                                                                                                                                                                                                                                                                                                                                                                                                                      | 1,391 (8.68)                     | 6,866 (14.15)       |
| ADl <sup>a</sup> , mean SD                                                                                                                                                                                                                                                                                                                                                                                                                                                                                                                                                                                                                  | 52.41 (15.06)                    | 53.38 (14.78)       |
| Smoking status, N (%)                                                                                                                                                                                                                                                                                                                                                                                                                                                                                                                                                                                                                       |                                  |                     |
| Never                                                                                                                                                                                                                                                                                                                                                                                                                                                                                                                                                                                                                                       | 8,264 (51.54)                    | 26,763 (55.14)      |
| Former                                                                                                                                                                                                                                                                                                                                                                                                                                                                                                                                                                                                                                      | 4,674 (29.15)                    | 10,806 (22.26)      |
| Current                                                                                                                                                                                                                                                                                                                                                                                                                                                                                                                                                                                                                                     | 3,097 (19.31)                    | 10,967 (22.60)      |
| Long-term care, N (%)                                                                                                                                                                                                                                                                                                                                                                                                                                                                                                                                                                                                                       | 246 (1.53)                       | 409 (0.84)          |
| Systolic blood pressure, mean SD                                                                                                                                                                                                                                                                                                                                                                                                                                                                                                                                                                                                            | 132.79 (19.07)                   | 131.63 (17.55)      |
| BMI, (mean SD)                                                                                                                                                                                                                                                                                                                                                                                                                                                                                                                                                                                                                              | 30.80 (6.40)                     | 31.21 (6.40)        |
| Cerebrovascular disease, N (%)                                                                                                                                                                                                                                                                                                                                                                                                                                                                                                                                                                                                              | 1,380 (8.61)                     | 2,045 (4.21)        |
| Cancer, N (%)                                                                                                                                                                                                                                                                                                                                                                                                                                                                                                                                                                                                                               | 2,073 (12.93)                    | 2,763 (5.69)        |
| Anxiety, N (%)                                                                                                                                                                                                                                                                                                                                                                                                                                                                                                                                                                                                                              | 2,121 (13.23)                    | 5,352 (11.03)       |
| Chronic kidney disease, N (%)                                                                                                                                                                                                                                                                                                                                                                                                                                                                                                                                                                                                               | 2,309 (14.40)                    | 3,042 (6.27)        |
| Cardiovascular disease, N (%)                                                                                                                                                                                                                                                                                                                                                                                                                                                                                                                                                                                                               | 3,869 (24.13)                    | 5,650 (11.64)       |
| Dementia, N (%)                                                                                                                                                                                                                                                                                                                                                                                                                                                                                                                                                                                                                             | 1,056 (6.59)                     | 1,439 (2.96)        |
| Depression, N (%)                                                                                                                                                                                                                                                                                                                                                                                                                                                                                                                                                                                                                           | 1,753 (10.93)                    | 4,775 (9.84)        |
| Diabetes mellitus type 2, N (%)                                                                                                                                                                                                                                                                                                                                                                                                                                                                                                                                                                                                             | 6,150 (38.35)                    | 11,664 (24.03)      |
| Lung disease, N (%)                                                                                                                                                                                                                                                                                                                                                                                                                                                                                                                                                                                                                         | 3,088 (19.26)                    | 5,566 (11.47)       |
| Peripheral artery disease, N (%)                                                                                                                                                                                                                                                                                                                                                                                                                                                                                                                                                                                                            | 348 (2.17)                       | 429 (0.88)          |
| Receipt of seasonal influenza vaccine in the year prior, N (%)                                                                                                                                                                                                                                                                                                                                                                                                                                                                                                                                                                              | 6,118 (38.15)                    | 9,183 (18.92)       |
| Number of inpatient visits, median (IQR)                                                                                                                                                                                                                                                                                                                                                                                                                                                                                                                                                                                                    | 0 (0, 0)                         | 0 (0, 0)            |
| Number of outpatient visits, median (IQR)                                                                                                                                                                                                                                                                                                                                                                                                                                                                                                                                                                                                   | 3 (2, 4)                         | 2 (1, 3)            |
| Number of blood chemistry panels, median (IQR)                                                                                                                                                                                                                                                                                                                                                                                                                                                                                                                                                                                              | 2 (1, 4)                         | 1 (1, 2)            |
| Number of unique medications, median (IQR)                                                                                                                                                                                                                                                                                                                                                                                                                                                                                                                                                                                                  | 11 (6, 18)                       | 7 (3, 12)           |
| Week of 2021 that participant tested positive, median (IQR)                                                                                                                                                                                                                                                                                                                                                                                                                                                                                                                                                                                 | 31 (27, 33)                      | 17 (8, 30)          |
| Care received at a medical center <sup>b</sup> , N (%)                                                                                                                                                                                                                                                                                                                                                                                                                                                                                                                                                                                      | 10,333 (64.44)                   | 29,717 (61.23)      |
| Percent of hospital system beds occupied <sup>c</sup> , median (IQR)                                                                                                                                                                                                                                                                                                                                                                                                                                                                                                                                                                        | 0.43 (0.35, 0.49)                | 0.40 (0.33, 0.48)   |
| Total number of hospital beds available in hospital system <sup>c</sup> , median (IQR)                                                                                                                                                                                                                                                                                                                                                                                                                                                                                                                                                      | 407 (228, 610)                   | 386 (227, 607)      |
| <p>All characteristics assessed in the year prior to testing positive for COVID-19, or equivalent T<sub>0</sub>.<br/> <sup>a</sup>ADI is a composite measure of socioeconomic deprivation that ranges from 0 (low deprivation) to 100 (high deprivation).<br/> <sup>b</sup>Complexity of the care system assessed whether participants receive care at a medical center vs an outpatient clinic.<br/> <sup>c</sup>Assessed as the average in the hospital system of care during the week of testing positive.<br/> ADI, Area Deprivation Index; BMI, body mass index; IQR, interquartile range; N, sample size; SD, standard deviation.</p> |                                  |                     |

**Extended Data Table 4:** Demographic and health characteristics of those with breakthrough COVID-19 who were hospitalized during the acute phase of the disease and those hospitalized with seasonal influenza.

| Characteristic                                                                                                                                                                                                                                                                                                                                                                  | Breakthrough COVID-19 (N=2,352) | Seasonal Influenza (N=14,154) |
|---------------------------------------------------------------------------------------------------------------------------------------------------------------------------------------------------------------------------------------------------------------------------------------------------------------------------------------------------------------------------------|---------------------------------|-------------------------------|
| Age, mean SD                                                                                                                                                                                                                                                                                                                                                                    | 72.14 (11.18)                   | 69.61 (12.74)                 |
| Race, N (%)                                                                                                                                                                                                                                                                                                                                                                     |                                 |                               |
| White                                                                                                                                                                                                                                                                                                                                                                           | 1,605 (68.24)                   | 10,339 (73.05)                |
| Black                                                                                                                                                                                                                                                                                                                                                                           | 572 (24.32)                     | 3,172 (22.41)                 |
| Other                                                                                                                                                                                                                                                                                                                                                                           | 175 (7.44)                      | 643 (4.54)                    |
| Sex, N (%)                                                                                                                                                                                                                                                                                                                                                                      |                                 |                               |
| Male                                                                                                                                                                                                                                                                                                                                                                            | 2,254 (95.83)                   | 13,351 (94.33)                |
| Female                                                                                                                                                                                                                                                                                                                                                                          | 98 (4.17)                       | 803 (5.67)                    |
| ADI <sup>a</sup> , mean SD                                                                                                                                                                                                                                                                                                                                                      | 53.03 (14.66)                   | 50.56 (15.47)                 |
| Smoking status, N (%)                                                                                                                                                                                                                                                                                                                                                           |                                 |                               |
| Never                                                                                                                                                                                                                                                                                                                                                                           | 1,086 (46.17)                   | 5,402 (38.17)                 |
| Former                                                                                                                                                                                                                                                                                                                                                                          | 758 (32.23)                     | 4,250 (30.03)                 |
| Current                                                                                                                                                                                                                                                                                                                                                                         | 508 (21.6)                      | 4,502 (31.81)                 |
| Long-term care, N (%)                                                                                                                                                                                                                                                                                                                                                           | 89 (3.78)                       | 1,150 (8.13)                  |
| Systolic blood pressure, (mean SD)                                                                                                                                                                                                                                                                                                                                              | 134.65 (23.59)                  | 133.03 (23.57)                |
| BMI, (mean SD)                                                                                                                                                                                                                                                                                                                                                                  | 29.95 (6.91)                    | 29.20 (6.98)                  |
| Cerebrovascular disease, N (%)                                                                                                                                                                                                                                                                                                                                                  | 366 (15.56)                     | 2,043 (14.43)                 |
| Cancer, N (%)                                                                                                                                                                                                                                                                                                                                                                   | 514 (21.85)                     | 2,490 (17.59)                 |
| Anxiety, N (%)                                                                                                                                                                                                                                                                                                                                                                  | 431 (18.33)                     | 3,097 (21.88)                 |
| Chronic kidney disease, N (%)                                                                                                                                                                                                                                                                                                                                                   | 635 (27)                        | 3,236 (22.86)                 |
| Cardiovascular disease, N (%)                                                                                                                                                                                                                                                                                                                                                   | 906 (38.52)                     | 5,527 (39.05)                 |
| Dementia, N (%)                                                                                                                                                                                                                                                                                                                                                                 | 319 (13.56)                     | 1,798 (12.7)                  |
| Depression, N (%)                                                                                                                                                                                                                                                                                                                                                               | 354 (15.05)                     | 2,242 (15.84)                 |
| Diabetes mellitus type 2, N (%)                                                                                                                                                                                                                                                                                                                                                 | 1,200 (51.02)                   | 6,273 (44.32)                 |
| Lung disease, N (%)                                                                                                                                                                                                                                                                                                                                                             | 739 (31.42)                     | 5,851 (41.34)                 |
| Peripheral artery disease, N (%)                                                                                                                                                                                                                                                                                                                                                | 119 (5.06)                      | 665 (4.7)                     |
| Receipt of seasonal influenza vaccine in the year prior, N (%)                                                                                                                                                                                                                                                                                                                  | 1,038 (44.13)                   | 7,021 (49.6)                  |
| Number of inpatient visits, median (IQR)                                                                                                                                                                                                                                                                                                                                        | 0 (0, 1)                        | 0 (0, 1)                      |
| Number of outpatient visits, median (IQR)                                                                                                                                                                                                                                                                                                                                       | 4 (3, 5)                        | 4 (3, 5)                      |
| Number of blood chemistry panels, median (IQR)                                                                                                                                                                                                                                                                                                                                  | 4 (2, 9)                        | 4 (2, 10)                     |
| Number of unique medications, median (IQR)                                                                                                                                                                                                                                                                                                                                      | 17 (10, 23)                     | 16 (10, 23)                   |
| All characteristics assessed in the year prior to testing positive for COVID-19, or equivalent T <sub>0</sub> .<br><sup>a</sup> ADI is a composite measure of socioeconomic deprivation that ranges from 0 (low deprivation) to 100 (high deprivation).<br>ADI, Area Deprivation Index; BMI, body mass index; IQR, interquartile range; N, sample size; SD, standard deviation. |                                 |                               |

**Extended Data Table 5:** Risk of negative outcome controls in those with breakthrough COVID-19 compared to the control group.

| Outcome                                                                                                                                                                                                                                                                                                                                                                                                                                                                                                                                                                                                                                                       | HR (95% CI)       |
|---------------------------------------------------------------------------------------------------------------------------------------------------------------------------------------------------------------------------------------------------------------------------------------------------------------------------------------------------------------------------------------------------------------------------------------------------------------------------------------------------------------------------------------------------------------------------------------------------------------------------------------------------------------|-------------------|
| Accidental injury or poisoning                                                                                                                                                                                                                                                                                                                                                                                                                                                                                                                                                                                                                                | 1.02 (0.91, 1.13) |
| Atopic dermatitis                                                                                                                                                                                                                                                                                                                                                                                                                                                                                                                                                                                                                                             | 1.01 (0.93, 1.09) |
| Models were weighted for age, race, ADI, the number in the year prior to testing positive of outpatient visits, inpatient visits, unique medication prescriptions, and routine blood chemistry panels, prior history of receiving an influenza vaccination, smoking status, anxiety, cancer, cardiovascular disease, cerebrovascular disease, chronic kidney disease, dementia, depression, type 2 diabetes mellitus, chronic obstructive pulmonary disease, and peripheral artery disease, systolic blood pressure, and body mass index (BMI), as well as algorithmically selected high dimensional variables.<br>HR, hazard ratio. CI, confidence interval. |                   |
